# Supplementary material for: Dip-coated rapeseed meal composite as a green carrier for light-induced controlled release of pesticide
Source: Royal Society of Chemistry journal article supplement (doi:10.1039/d0nj02771e), 2020-01-01
Supplement: d0nj02771e1.pdf [file d0nj02771e1.pdf]

Supporting Information  
New Journal of Chemistry

**Dip coated rapeseed meal composite as a green carrier for  
light induced controlled release of pesticide**

Chenxi Yang<sup>a, b, c, d</sup>, Juan Li<sup>a, b, c, d</sup>, Jian Wang<sup>a, b, c, d</sup>, Zhen Guo<sup>a, b, c, d</sup>, Huanyuan  
Wang<sup>a, b, c, d</sup>, Chendi Shi<sup>a, b, c, d</sup>, Dongwen Hua<sup>e</sup>, Ling Li<sup>\*, f</sup>

a. ShaanXi Provincial Land Engineering Construction Group Co., Ltd., Xi'an 710075,  
China.

b. Institute of Land Engineering and Technology, Shaanxi Provincial Land Engineering  
Construction Group Co., Ltd., Xi'an 710075, China.

c. Key Laboratory of Degraded and Unused Land Consolidation Engineering, the  
Ministry of Natural Resources. Ltd., Xi'an 710075, China.

d. Shaanxi Provincial Land Consolidation Engineering Technology Research Center.  
Xi'an 710075, China.

e. Shaanxi Key Laboratory of Land Consolidation. Xi'an 710021, China.

f. College of Land Engineering, Chang'an University. Xi'an 710021, China.

\* Corresponding author

Email address: liling\_sxdj@163.com

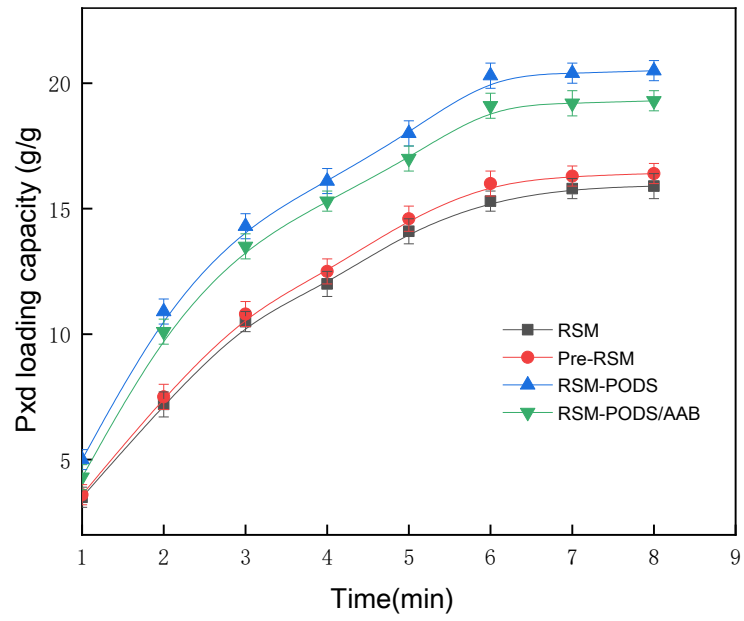

**Figure S1.**The Pxd loading capacity of RSM, Pre-RSM, RSM-PODS, and RSM-PODS/AAB at different times.

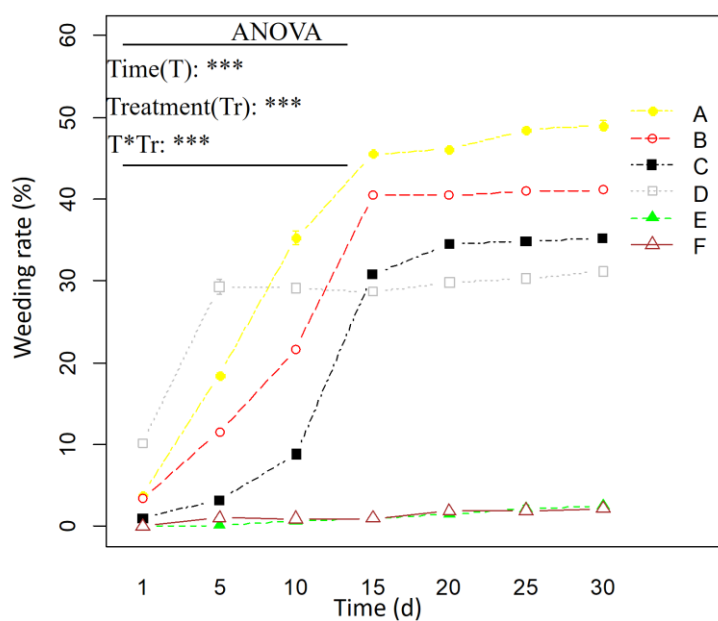

**Figure S2.** The statistical evaluations of weeding rate of Pxd-loaded RSM-PODS/AAB with different light. (A) RSM-PODS/AAB (UV-vis), (B) RSM-PODS/AAB (sunlight), (C) RSM-PODS/AAB (without light), (D) Pxd, (E) (UV-vis) and (F) sunlight.

Table S1. Atomic concentrations from XPS survey scans.

| Sample | RSM   | Pre-RSM | RSM-PODS | RSM-PODS/AAB |
|--------|-------|---------|----------|--------------|
| Si2p   | 0     | 0       | 1.19     | 1.20         |
| C1s    | 77.87 | 77.16   | 76.93    | 77.97        |
| N1s    | 3.1   | 3.5     | 3.51     | 3.27         |
| O1s    | 19.03 | 19.34   | 18.37    | 17.56        |

Table S2. DSS of RSM-PODS and RSM-PODS/AAB calculated from %Si.

| Sample       | % Si | DSS   |
|--------------|------|-------|
| RSM-PODS     | 1.19 | 0.079 |
| RSM-PODS/AAB | 1.20 | 0.078 |
